# Supplementary material for: AKR1C3 Expression in T and B Acute Lymphoblastic Leukemia/Lymphoma for Clinical Use as a Biomarker
Source: Research Square preprint supplement (doi:10.21203/rs.3.rs-1009027/v1), 2021-11-03
Supplement: Supplementary file 1 [file a2a3a24801e118e7aadc04bb.docx]

| **Demographic** | | **Result** |
| --- | --- | --- |
| **Gender (M:F)** | | (33:14) |
| **Median age at biopsy** | | 50yo (range 20yo – 60yo) |
| **Transplant Diagnosis** | |  |
|  | T-ALL | 16 IHC, 14 RT-qPCR + Protein Wes |
|  | B-ALL | 23 (14 BMA, 9 decal) |
|  | Normal | 6 |
| **Disease details** | |  |
|  | **T-ALL disease involvement** |  |
|  | 0-25% | 10 |
|  | 26-50% | 1 |
|  | 51-75% | 3 |
|  | 76-100% | 2 |
|  | **B-ALL disease involvement** |  |
|  | 0-25% | 0 |
|  | 26-50% | 6 |
|  | 51-75% | 4 |
|  | 76-100% | 4 |
|  | **Decal disease involvement** |  |
|  | 0-25% | 0 |
|  | 26-50% | 1 |
|  | 51-75% | 0 |
|  | 76-100% | 8 |
